# Supplementary material
Source: publisher site journal article supplement (https://www.spandidos-publications.com/3145/downloadSupplementary)
Supplement: Supplementary file 1 [file downloadSupplementary]

## Sheet: kegg
Table SV. Statistically significant KEGG pathways for AKI-24 h/CON-24 h.
Pathway Name	Pathway ID	Pvalue	Pvalue_adjusted	Genes	Count	Pop Hit	List_Total	Background Genes	URL
Lysosome	hsa04142	1.11e-08	1.73e-06	CTSB|0.3105;GAA|0.6026;CTSC|0.3076;CTSH|0.4699;CTSA|0.4571;GLB1|0.52;CD63|5.7016;GNS|0.4246;LAMP1|2.6062;ARSA|0.5754;HEXB|1.3804;NEU1|0.597;NAGLU|0.5546	13	123	98	7057	http://www.kegg.jp/kegg-bin/show_pathway?hsa04142/hsa:1508%09blue/hsa:2548%09blue/hsa:1075%09blue/hsa:1512%09blue/hsa:5476%09blue/hsa:2720%09blue/hsa:967%09red/hsa:2799%09blue/hsa:3916%09red/hsa:410%09blue/hsa:3074%09red/hsa:4758%09blue/hsa:4669%09blue
Complement and coagulation cascades	hsa04610	1.09e-07	8.53e-06	VWF|1.3804;SERPINC1|0.6026;VTN|0.0809;SERPINA5|0.0698;MASP2|0.4446;SERPINA1|0.6546;C3|1.3804;A2M|22.9087;PLG|0.3908;C4A|0.3467	10	79	98	7057	http://www.kegg.jp/kegg-bin/show_pathway?hsa04610/hsa:7450%09red/hsa:462%09blue/hsa:7448%09blue/hsa:5104%09blue/hsa:10747%09blue/hsa:5265%09blue/hsa:718%09red/hsa:2%09red/hsa:5340%09blue/hsa:720%09blue
Renin-angiotensin system	hsa04614	1.29e-05	0.000669	MME|2.2284;ACE|8.2414;CTSA|0.4571;PRCP|0.0685;KLK1|0.0238	5	23	98	7057	http://www.kegg.jp/kegg-bin/show_pathway?hsa04614/hsa:4311%09red/hsa:1636%09red/hsa:5476%09blue/hsa:5547%09blue/hsa:3816%09blue
Other glycan degradation	hsa00511	9.22e-05	0.00327	MAN2B2|0.3048;GLB1|0.52;HEXB|1.3804;NEU1|0.597	4	18	98	7057	http://www.kegg.jp/kegg-bin/show_pathway?hsa00511/hsa:23324%09blue/hsa:2720%09blue/hsa:3074%09red/hsa:4758%09blue
Glycosaminoglycan degradation	hsa00531	0.000116	0.00327	GLB1|0.52;GNS|0.4246;HEXB|1.3804;NAGLU|0.5546	4	19	98	7057	http://www.kegg.jp/kegg-bin/show_pathway?hsa00531/hsa:2720%09blue/hsa:2799%09blue/hsa:3074%09red/hsa:4669%09blue
Staphylococcus aureus infection	hsa05150	0.000126	0.00327	KRT10|5.3951;MASP2|0.4446;HLA-DRA|1.406;C3|1.3804;PLG|0.3908;C4A|0.3467	6	57	98	7057	http://www.kegg.jp/kegg-bin/show_pathway?hsa05150/hsa:3858%09red/hsa:10747%09blue/hsa:3122%09red/hsa:718%09red/hsa:5340%09blue/hsa:720%09blue
Carbon metabolism	hsa01200	0.00016	0.00357	PKM|4.9659;ALDOA|2.9923;MDH1|2.7542;PGK1|2.0324;TPI1|2.0893;GAPDH|2.2699;CAT|22.4905;IDH1|6.9183	8	113	98	7057	http://www.kegg.jp/kegg-bin/show_pathway?hsa01200/hsa:5315%09red/hsa:226%09red/hsa:4190%09red/hsa:5230%09red/hsa:7167%09red/hsa:2597%09red/hsa:847%09red/hsa:3417%09red
Protein digestion and absorption	hsa04974	0.000234	0.00457	MME|2.2284;DPP4|2.3335;COL6A1|0.3162;PGA3|0.2208;COL15A1|0.1556;PRCP|0.0685;SLC3A2|0.4742	7	90	98	7057	http://www.kegg.jp/kegg-bin/show_pathway?hsa04974/hsa:4311%09red/hsa:1803%09red/hsa:1291%09blue/hsa:101929842%09blue/hsa:1306%09blue/hsa:5547%09blue/hsa:6520%09blue
Biosynthesis of amino acids	hsa01230	0.000572	0.00991	PKM|4.9659;ALDOA|2.9923;PGK1|2.0324;TPI1|2.0893;GAPDH|2.2699;IDH1|6.9183	6	75	98	7057	http://www.kegg.jp/kegg-bin/show_pathway?hsa01230/hsa:5315%09red/hsa:226%09red/hsa:5230%09red/hsa:7167%09red/hsa:2597%09red/hsa:3417%09red
African trypanosomiasis	hsa05143	0.00132	0.0205	HBB|1.6749;HBA1|1.5996;VCAM1|9.4624;APOA1|10.8643	4	35	98	7057	http://www.kegg.jp/kegg-bin/show_pathway?hsa05143/hsa:3043%09red/hsa:3039%09red/hsa:7412%09red/hsa:335%09red
Glycolysis / Gluconeogenesis	hsa00010	0.00228	0.0323	PKM|4.9659;ALDOA|2.9923;PGK1|2.0324;TPI1|2.0893;GAPDH|2.2699	5	67	98	7057	http://www.kegg.jp/kegg-bin/show_pathway?hsa00010/hsa:5315%09red/hsa:226%09red/hsa:5230%09red/hsa:7167%09red/hsa:2597%09red
Proximal tubule bicarbonate reclamation	hsa04964	0.00376	0.0489	MDH1|2.7542;AQP1|0.0133;CA2|8.7096	3	23	98	7057	http://www.kegg.jp/kegg-bin/show_pathway?hsa04964/hsa:4190%09red/hsa:358%09blue/hsa:760%09red
ECM-receptor interaction	hsa04512	0.00547	0.0657	VWF|1.3804;VTN|0.0809;COL6A1|0.3162;SPP1|0.1738;FN1|2.3988	5	82	98	7057	http://www.kegg.jp/kegg-bin/show_pathway?hsa04512/hsa:7450%09red/hsa:7448%09blue/hsa:1291%09blue/hsa:6696%09blue/hsa:2335%09red
Galactose metabolism	hsa00052	0.00881	0.0981	GAA|0.6026;MGAM|3.5318;GLB1|0.52	3	31	98	7057	http://www.kegg.jp/kegg-bin/show_pathway?hsa00052/hsa:2548%09blue/hsa:8972%09red/hsa:2720%09blue
Fructose and mannose metabolism	hsa00051	0.0105	0.109	ALDOA|2.9923;TPI1|2.0893;SORD|13.1826	3	33	98	7057	http://www.kegg.jp/kegg-bin/show_pathway?hsa00051/hsa:226%09red/hsa:7167%09red/hsa:6652%09red
Longevity regulating pathway - multiple species	hsa04213	0.0118	0.114	HSPA8|2.3988;CRYAB|0.2333;CAT|22.4905;SOD1|5.7016	4	64	98	7057	http://www.kegg.jp/kegg-bin/show_pathway?hsa04213/hsa:3312%09red/hsa:1410%09blue/hsa:847%09red/hsa:6647%09red
Amoebiasis	hsa05146	0.0124	0.114	CD14|0.8241;SERPINB13|0.3373;HSPB1|0.3837;SERPINB3|0.0377;FN1|2.3988	5	100	98	7057	http://www.kegg.jp/kegg-bin/show_pathway?hsa05146/hsa:929%09blue/hsa:5275%09blue/hsa:3315%09blue/hsa:6317%09blue/hsa:2335%09red
HIF-1 signaling pathway	hsa04066	0.014	0.121	ALDOA|2.9923;PGK1|2.0324;EGF|0.7943;GAPDH|2.2699;TIMP1|18.197	5	103	98	7057	http://www.kegg.jp/kegg-bin/show_pathway?hsa04066/hsa:226%09red/hsa:5230%09red/hsa:1950%09blue/hsa:2597%09red/hsa:7076%09red
Pyruvate metabolism	hsa00620	0.0177	0.139	PKM|4.9659;MDH1|2.7542;GLO1|4.4463	3	40	98	7057	http://www.kegg.jp/kegg-bin/show_pathway?hsa00620/hsa:5315%09red/hsa:4190%09red/hsa:2739%09red
Glycosphingolipid biosynthesis - ganglio series	hsa00604	0.0178	0.139	GLB1|0.52;HEXB|1.3804	2	15	98	7057	http://www.kegg.jp/kegg-bin/show_pathway?hsa00604/hsa:2720%09blue/hsa:3074%09red
Focal adhesion	hsa04510	0.0224	0.148	VWF|1.3804;MYLK|0.7516;VTN|0.0809;COL6A1|0.3162;EGF|0.7943;SPP1|0.1738;FN1|2.3988	7	203	98	7057	http://www.kegg.jp/kegg-bin/show_pathway?hsa04510/hsa:7450%09red/hsa:4638%09blue/hsa:7448%09blue/hsa:1291%09blue/hsa:1950%09blue/hsa:6696%09blue/hsa:2335%09red
Nitrogen metabolism	hsa00910	0.0227	0.148	CA2|8.7096;CA1|52.9663	2	17	98	7057	http://www.kegg.jp/kegg-bin/show_pathway?hsa00910/hsa:760%09red/hsa:759%09red
Type I diabetes mellitus	hsa04940	0.0228	0.148	PTPRN|0.7047;HLA-DRA|1.406;CPE|21.0863	3	44	98	7057	http://www.kegg.jp/kegg-bin/show_pathway?hsa04940/hsa:5798%09blue/hsa:3122%09red/hsa:1363%09red
Antigen processing and presentation	hsa04612	0.0228	0.148	CTSB|0.3105;HSP90AA1|2.466;HSPA8|2.3988;HLA-DRA|1.406	4	78	98	7057	http://www.kegg.jp/kegg-bin/show_pathway?hsa04612/hsa:1508%09blue/hsa:3320%09red/hsa:3312%09red/hsa:3122%09red
Sphingolipid metabolism	hsa00600	0.0271	0.167	GLB1|0.52;ARSA|0.5754;NEU1|0.597	3	47	98	7057	http://www.kegg.jp/kegg-bin/show_pathway?hsa00600/hsa:2720%09blue/hsa:410%09blue/hsa:4758%09blue
Peroxisome	hsa04146	0.0279	0.167	PRDX1|2.9107;CAT|22.4905;SOD1|5.7016;IDH1|6.9183	4	83	98	7057	http://www.kegg.jp/kegg-bin/show_pathway?hsa04146/hsa:5052%09red/hsa:847%09red/hsa:6647%09red/hsa:3417%09red
Regulation of actin cytoskeleton	hsa04810	0.0295	0.168	CD14|0.8241;GSN|0.0718;MSN|3.9084;MYLK|0.7516;RDX|1.5704;EGF|0.7943;FN1|2.3988	7	215	98	7057	http://www.kegg.jp/kegg-bin/show_pathway?hsa04810/hsa:929%09blue/hsa:2934%09blue/hsa:4478%09red/hsa:4638%09blue/hsa:5962%09red/hsa:1950%09blue/hsa:2335%09red
Malaria	hsa05144	0.0302	0.168	HBB|1.6749;HBA1|1.5996;VCAM1|9.4624	3	49	98	7057	http://www.kegg.jp/kegg-bin/show_pathway?hsa05144/hsa:3043%09red/hsa:3039%09red/hsa:7412%09red
Arginine and proline metabolism	hsa00330	0.0318	0.171	CNDP2|2.6303;CKB|15.1356;AOC1|2.0701	3	50	98	7057	http://www.kegg.jp/kegg-bin/show_pathway?hsa00330/hsa:55748%09red/hsa:1152%09red/hsa:26%09red
Legionellosis	hsa05134	0.0405	0.204	CD14|0.8241;HSPA8|2.3988;C3|1.3804	3	55	98	7057	http://www.kegg.jp/kegg-bin/show_pathway?hsa05134/hsa:929%09blue/hsa:3312%09red/hsa:718%09red
Pathogenic Escherichia coli infection	hsa05130	0.0405	0.204	CD14|0.8241;YWHAZ|2.704;CDH1|0.8091	3	55	98	7057	http://www.kegg.jp/kegg-bin/show_pathway?hsa05130/hsa:929%09blue/hsa:7534%09red/hsa:999%09blue
Histidine metabolism	hsa00340	0.0432	0.204	CNDP2|2.6303;AOC1|2.0701	2	24	98	7057	http://www.kegg.jp/kegg-bin/show_pathway?hsa00340/hsa:55748%09red/hsa:26%09red
Vitamin digestion and absorption	hsa04977	0.0432	0.204	CUBN|0.1067;APOA1|10.8643	2	24	98	7057	http://www.kegg.jp/kegg-bin/show_pathway?hsa04977/hsa:8029%09blue/hsa:335%09red
Glyoxylate and dicarboxylate metabolism	hsa00630	0.0571	0.262	MDH1|2.7542;CAT|22.4905	2	28	98	7057	http://www.kegg.jp/kegg-bin/show_pathway?hsa00630/hsa:4190%09red/hsa:847%09red
Renin secretion	hsa04924	0.0589	0.263	CTSB|0.3105;ACE|8.2414;AQP1|0.0133	3	64	98	7057	http://www.kegg.jp/kegg-bin/show_pathway?hsa04924/hsa:1508%09blue/hsa:1636%09red/hsa:358%09blue
Citrate cycle (TCA cycle)	hsa00020	0.0646	0.274	MDH1|2.7542;IDH1|6.9183	2	30	98	7057	http://www.kegg.jp/kegg-bin/show_pathway?hsa00020/hsa:4190%09red/hsa:3417%09red
Proteoglycans in cancer	hsa05205	0.065	0.274	LUM|0.2421;MSN|3.9084;VTN|0.0809;RDX|1.5704;FN1|2.3988;CD63|5.7016	6	205	98	7057	http://www.kegg.jp/kegg-bin/show_pathway?hsa05205/hsa:4060%09blue/hsa:4478%09red/hsa:7448%09blue/hsa:5962%09red/hsa:2335%09red/hsa:967%09red
Protein processing in endoplasmic reticulum	hsa04141	0.0806	0.331	HSP90AA1|2.466;HSPA8|2.3988;LMAN2|0.2466;CRYAB|0.2333;MAN1A1|0.1096	5	166	98	7057	http://www.kegg.jp/kegg-bin/show_pathway?hsa04141/hsa:3320%09red/hsa:3312%09red/hsa:10960%09blue/hsa:1410%09blue/hsa:4121%09blue
Pertussis	hsa05133	0.0858	0.343	CD14|0.8241;C3|1.3804;C4A|0.3467	3	75	98	7057	http://www.kegg.jp/kegg-bin/show_pathway?hsa05133/hsa:929%09blue/hsa:718%09red/hsa:720%09blue
PI3K-Akt signaling pathway	hsa04151	0.102	0.397	VWF|1.3804;HSP90AA1|2.466;VTN|0.0809;COL6A1|0.3162;YWHAZ|2.704;EGF|0.7943;SPP1|0.1738;FN1|2.3988	8	342	98	7057	http://www.kegg.jp/kegg-bin/show_pathway?hsa04151/hsa:7450%09red/hsa:3320%09red/hsa:7448%09blue/hsa:1291%09blue/hsa:7534%09red/hsa:1950%09blue/hsa:6696%09blue/hsa:2335%09red
Tryptophan metabolism	hsa00380	0.106	0.404	AOC1|2.0701;CAT|22.4905	2	40	98	7057	http://www.kegg.jp/kegg-bin/show_pathway?hsa00380/hsa:26%09red/hsa:847%09red
Bladder cancer	hsa05219	0.111	0.41	EGF|0.7943;CDH1|0.8091	2	41	98	7057	http://www.kegg.jp/kegg-bin/show_pathway?hsa05219/hsa:1950%09blue/hsa:999%09blue
Hematopoietic cell lineage	hsa04640	0.123	0.446	CD14|0.8241;MME|2.2284;HLA-DRA|1.406	3	88	98	7057	http://www.kegg.jp/kegg-bin/show_pathway?hsa04640/hsa:929%09blue/hsa:4311%09red/hsa:3122%09red
Prostate cancer	hsa05215	0.126	0.447	HSP90AA1|2.466;KLK3|65.4636;EGF|0.7943	3	89	98	7057	http://www.kegg.jp/kegg-bin/show_pathway?hsa05215/hsa:3320%09red/hsa:354%09red/hsa:1950%09blue
Cysteine and methionine metabolism	hsa00270	0.129	0.447	MDH1|2.7542;BHMT|0.8166	2	45	98	7057	http://www.kegg.jp/kegg-bin/show_pathway?hsa00270/hsa:4190%09red/hsa:635%09blue
Taurine and hypotaurine metabolism	hsa00430	0.143	0.484	GGT1|5.0582	1	11	98	7057	http://www.kegg.jp/kegg-bin/show_pathway?hsa00430/hsa:2678%09red
Amyotrophic lateral sclerosis (ALS)	hsa05014	0.158	0.517	CAT|22.4905;SOD1|5.7016	2	51	98	7057	http://www.kegg.jp/kegg-bin/show_pathway?hsa05014/hsa:847%09red/hsa:6647%09red
Endometrial cancer	hsa05213	0.162	0.517	EGF|0.7943;CDH1|0.8091	2	52	98	7057	http://www.kegg.jp/kegg-bin/show_pathway?hsa05213/hsa:1950%09blue/hsa:999%09blue
Glutathione metabolism	hsa00480	0.162	0.517	GGT1|5.0582;IDH1|6.9183	2	52	98	7057	http://www.kegg.jp/kegg-bin/show_pathway?hsa00480/hsa:2678%09red/hsa:3417%09red
Phagosome	hsa04145	0.168	0.525	CD14|0.8241;HLA-DRA|1.406;LAMP1|2.6062;C3|1.3804	4	155	98	7057	http://www.kegg.jp/kegg-bin/show_pathway?hsa04145/hsa:929%09blue/hsa:3122%09red/hsa:3916%09red/hsa:718%09red
Glycosphingolipid biosynthesis - globo series	hsa00603	0.178	0.534	HEXB|1.3804	1	14	98	7057	http://www.kegg.jp/kegg-bin/show_pathway?hsa00603/hsa:3074%09red
Folate biosynthesis	hsa00790	0.178	0.534	GGH|0.492	1	14	98	7057	http://www.kegg.jp/kegg-bin/show_pathway?hsa00790/hsa:8836%09blue
Starch and sucrose metabolism	hsa00500	0.187	0.541	GAA|0.6026;MGAM|3.5318	2	57	98	7057	http://www.kegg.jp/kegg-bin/show_pathway?hsa00500/hsa:2548%09blue/hsa:8972%09red
Metabolic pathways	hsa01100	0.187	0.541	PKM|4.9659;GAA|0.6026;ALDOA|2.9923;MDH1|2.7542;MGAM|3.5318;PRDX6|8.9536;CNDP2|2.6303;PGK1|2.0324;CKB|15.1356;AOC1|2.0701;TPI1|2.0893;GAPDH|2.2699;BHMT|0.8166;GLB1|0.52;GNS|0.4246;SORD|13.1826;HEXB|1.3804;GGT1|5.0582;MAN1A1|0.1096;NAGLU|0.5546;IDH1|6.9183	21	1239	98	7057	http://www.kegg.jp/kegg-bin/show_pathway?hsa01100/hsa:5315%09red/hsa:2548%09blue/hsa:226%09red/hsa:4190%09red/hsa:8972%09red/hsa:9588%09red/hsa:55748%09red/hsa:5230%09red/hsa:1152%09red/hsa:26%09red/hsa:7167%09red/hsa:2597%09red/hsa:635%09blue/hsa:2720%09blue/hsa:2799%09blue/hsa:6652%09red/hsa:3074%09red/hsa:2678%09red/hsa:4121%09blue/hsa:4669%09blue/hsa:3417%09red
2-Oxocarboxylic acid metabolism	hsa01210	0.223	0.632	IDH1|6.9183	1	18	98	7057	http://www.kegg.jp/kegg-bin/show_pathway?hsa01210/hsa:3417%09red
Tuberculosis	hsa05152	0.237	0.652	CD14|0.8241;HLA-DRA|1.406;LAMP1|2.6062;C3|1.3804	4	179	98	7057	http://www.kegg.jp/kegg-bin/show_pathway?hsa05152/hsa:929%09blue/hsa:3122%09red/hsa:3916%09red/hsa:718%09red
Central carbon metabolism in cancer	hsa05230	0.238	0.652	PKM|4.9659;IDH1|6.9183	2	67	98	7057	http://www.kegg.jp/kegg-bin/show_pathway?hsa05230/hsa:5315%09red/hsa:3417%09red
Bile secretion	hsa04976	0.259	0.685	AQP1|0.0133;CA2|8.7096	2	71	98	7057	http://www.kegg.jp/kegg-bin/show_pathway?hsa04976/hsa:358%09blue/hsa:760%09red
Melanoma	hsa05218	0.259	0.685	EGF|0.7943;CDH1|0.8091	2	71	98	7057	http://www.kegg.jp/kegg-bin/show_pathway?hsa05218/hsa:1950%09blue/hsa:999%09blue
PPAR signaling pathway	hsa03320	0.264	0.687	FABP5|0.0296;APOA1|10.8643	2	72	98	7057	http://www.kegg.jp/kegg-bin/show_pathway?hsa03320/hsa:2171%09blue/hsa:335%09red
Leishmaniasis	hsa05140	0.274	0.691	HLA-DRA|1.406;C3|1.3804	2	74	98	7057	http://www.kegg.jp/kegg-bin/show_pathway?hsa05140/hsa:3122%09red/hsa:718%09red
Gastric acid secretion	hsa04971	0.274	0.691	MYLK|0.7516;CA2|8.7096	2	74	98	7057	http://www.kegg.jp/kegg-bin/show_pathway?hsa04971/hsa:4638%09blue/hsa:760%09red
Systemic lupus erythematosus	hsa05322	0.293	0.719	HLA-DRA|1.406;C3|1.3804;C4A|0.3467	3	136	98	7057	http://www.kegg.jp/kegg-bin/show_pathway?hsa05322/hsa:3122%09red/hsa:718%09red/hsa:720%09blue
Bacterial invasion of epithelial cells	hsa05100	0.295	0.719	CDH1|0.8091;FN1|2.3988	2	78	98	7057	http://www.kegg.jp/kegg-bin/show_pathway?hsa05100/hsa:999%09blue/hsa:2335%09red
Apoptosis	hsa04210	0.308	0.724	CTSB|0.3105;CTSC|0.3076;CTSH|0.4699	3	140	98	7057	http://www.kegg.jp/kegg-bin/show_pathway?hsa04210/hsa:1508%09blue/hsa:1075%09blue/hsa:1512%09blue
Epstein-Barr virus infection	hsa05169	0.315	0.724	HSPB1|0.3837;YWHAZ|2.704;HSPA8|2.3988;HLA-DRA|1.406	4	204	98	7057	http://www.kegg.jp/kegg-bin/show_pathway?hsa05169/hsa:3315%09blue/hsa:7534%09red/hsa:3312%09red/hsa:3122%09red
Collecting duct acid secretion	hsa04966	0.315	0.724	CA2|8.7096	1	27	98	7057	http://www.kegg.jp/kegg-bin/show_pathway?hsa04966/hsa:760%09red
Viral carcinogenesis	hsa05203	0.318	0.724	PKM|4.9659;GSN|0.0718;YWHAZ|2.704;C3|1.3804	4	205	98	7057	http://www.kegg.jp/kegg-bin/show_pathway?hsa05203/hsa:5315%09red/hsa:2934%09blue/hsa:7534%09red/hsa:718%09red
Hypertrophic cardiomyopathy (HCM)	hsa05410	0.321	0.724	ACE|8.2414;TPM4|0.3076	2	83	98	7057	http://www.kegg.jp/kegg-bin/show_pathway?hsa05410/hsa:1636%09red/hsa:7171%09blue
Cell adhesion molecules (CAMs)	hsa04514	0.331	0.724	VCAM1|9.4624;CDH1|0.8091;HLA-DRA|1.406	3	146	98	7057	http://www.kegg.jp/kegg-bin/show_pathway?hsa04514/hsa:7412%09red/hsa:999%09blue/hsa:3122%09red
Thyroid cancer	hsa05216	0.334	0.724	CDH1|0.8091	1	29	98	7057	http://www.kegg.jp/kegg-bin/show_pathway?hsa05216/hsa:999%09blue
Pentose phosphate pathway	hsa00030	0.334	0.724	ALDOA|2.9923	1	29	98	7057	http://www.kegg.jp/kegg-bin/show_pathway?hsa00030/hsa:226%09red
beta-Alanine metabolism	hsa00410	0.352	0.753	CNDP2|2.6303	1	31	98	7057	http://www.kegg.jp/kegg-bin/show_pathway?hsa00410/hsa:55748%09red
Asthma	hsa05310	0.361	0.762	HLA-DRA|1.406	1	32	98	7057	http://www.kegg.jp/kegg-bin/show_pathway?hsa05310/hsa:3122%09red
NF-kappa B signaling pathway	hsa04064	0.372	0.773	CD14|0.8241;VCAM1|9.4624	2	93	98	7057	http://www.kegg.jp/kegg-bin/show_pathway?hsa04064/hsa:929%09blue/hsa:7412%09red
Prion diseases	hsa05020	0.388	0.796	SOD1|5.7016	1	35	98	7057	http://www.kegg.jp/kegg-bin/show_pathway?hsa05020/hsa:6647%09red
Pentose and glucuronate interconversions	hsa00040	0.396	0.798	SORD|13.1826	1	36	98	7057	http://www.kegg.jp/kegg-bin/show_pathway?hsa00040/hsa:6652%09red
Estrogen signaling pathway	hsa04915	0.401	0.798	HSP90AA1|2.466;HSPA8|2.3988	2	99	98	7057	http://www.kegg.jp/kegg-bin/show_pathway?hsa04915/hsa:3320%09red/hsa:3312%09red
AGE-RAGE signaling pathway in diabetic complications	hsa04933	0.411	0.798	VCAM1|9.4624;FN1|2.3988	2	101	98	7057	http://www.kegg.jp/kegg-bin/show_pathway?hsa04933/hsa:7412%09red/hsa:2335%09red
Alzheimer's disease	hsa05010	0.414	0.798	MME|2.2284;GAPDH|2.2699;APOE|0.5105	3	168	98	7057	http://www.kegg.jp/kegg-bin/show_pathway?hsa05010/hsa:4311%09red/hsa:2597%09red/hsa:348%09blue
Allograft rejection	hsa05330	0.421	0.798	HLA-DRA|1.406	1	39	98	7057	http://www.kegg.jp/kegg-bin/show_pathway?hsa05330/hsa:3122%09red
Chagas disease (American trypanosomiasis)	hsa05142	0.425	0.798	ACE|8.2414;C3|1.3804	2	104	98	7057	http://www.kegg.jp/kegg-bin/show_pathway?hsa05142/hsa:1636%09red/hsa:718%09red
Glycine, serine and threonine metabolism	hsa00260	0.429	0.798	BHMT|0.8166	1	40	98	7057	http://www.kegg.jp/kegg-bin/show_pathway?hsa00260/hsa:635%09blue
Toll-like receptor signaling pathway	hsa04620	0.435	0.798	CD14|0.8241;SPP1|0.1738	2	106	98	7057	http://www.kegg.jp/kegg-bin/show_pathway?hsa04620/hsa:929%09blue/hsa:6696%09blue
Fat digestion and absorption	hsa04975	0.437	0.798	APOA1|10.8643	1	41	98	7057	http://www.kegg.jp/kegg-bin/show_pathway?hsa04975/hsa:335%09red
Influenza A	hsa05164	0.444	0.798	HSPA8|2.3988;HLA-DRA|1.406;PLG|0.3908	3	176	98	7057	http://www.kegg.jp/kegg-bin/show_pathway?hsa05164/hsa:3312%09red/hsa:3122%09red/hsa:5340%09blue
Graft-versus-host disease	hsa05332	0.445	0.798	HLA-DRA|1.406	1	42	98	7057	http://www.kegg.jp/kegg-bin/show_pathway?hsa05332/hsa:3122%09red
MAPK signaling pathway	hsa04010	0.475	0.8	CD14|0.8241;HSPB1|0.3837;HSPA8|2.3988;EGF|0.7943	4	255	98	7057	http://www.kegg.jp/kegg-bin/show_pathway?hsa04010/hsa:929%09blue/hsa:3315%09blue/hsa:3312%09red/hsa:1950%09blue
Carbohydrate digestion and absorption	hsa04973	0.476	0.8	MGAM|3.5318	1	46	98	7057	http://www.kegg.jp/kegg-bin/show_pathway?hsa04973/hsa:8972%09red
Endocrine and other factor-regulated calcium reabsorption	hsa04961	0.483	0.8	KLK1|0.0238	1	47	98	7057	http://www.kegg.jp/kegg-bin/show_pathway?hsa04961/hsa:3816%09blue
Hedgehog signaling pathway	hsa04340	0.483	0.8	LRP2|0.1459	1	47	98	7057	http://www.kegg.jp/kegg-bin/show_pathway?hsa04340/hsa:4036%09blue
Type II diabetes mellitus	hsa04930	0.49	0.8	PKM|4.9659	1	48	98	7057	http://www.kegg.jp/kegg-bin/show_pathway?hsa04930/hsa:5315%09red
Amino sugar and nucleotide sugar metabolism	hsa00520	0.49	0.8	HEXB|1.3804	1	48	98	7057	http://www.kegg.jp/kegg-bin/show_pathway?hsa00520/hsa:3074%09red
Endocytosis	hsa04144	0.49	0.8	PDCD6IP|2.0701;FOLR1|0.2188;HSPA8|2.3988;EGF|0.7943	4	260	98	7057	http://www.kegg.jp/kegg-bin/show_pathway?hsa04144/hsa:10015%09red/hsa:2348%09blue/hsa:3312%09red/hsa:1950%09blue
Leukocyte transendothelial migration	hsa04670	0.491	0.8	MSN|3.9084;VCAM1|9.4624	2	118	98	7057	http://www.kegg.jp/kegg-bin/show_pathway?hsa04670/hsa:4478%09red/hsa:7412%09red
Toxoplasmosis	hsa05145	0.495	0.8	HSPA8|2.3988;HLA-DRA|1.406	2	119	98	7057	http://www.kegg.jp/kegg-bin/show_pathway?hsa05145/hsa:3312%09red/hsa:3122%09red
N-Glycan biosynthesis	hsa00510	0.497	0.8	MAN1A1|0.1096	1	49	98	7057	http://www.kegg.jp/kegg-bin/show_pathway?hsa00510/hsa:4121%09blue
Intestinal immune network for IgA production	hsa04672	0.504	0.801	HLA-DRA|1.406	1	50	98	7057	http://www.kegg.jp/kegg-bin/show_pathway?hsa04672/hsa:3122%09red
Platelet activation	hsa04611	0.508	0.801	VWF|1.3804;MYLK|0.7516	2	122	98	7057	http://www.kegg.jp/kegg-bin/show_pathway?hsa04611/hsa:7450%09red/hsa:4638%09blue
Autoimmune thyroid disease	hsa05320	0.531	0.829	HLA-DRA|1.406	1	54	98	7057	http://www.kegg.jp/kegg-bin/show_pathway?hsa05320/hsa:3122%09red
Non-small cell lung cancer	hsa05223	0.544	0.841	EGF|0.7943	1	56	98	7057	http://www.kegg.jp/kegg-bin/show_pathway?hsa05223/hsa:1950%09blue
NOD-like receptor signaling pathway	hsa04621	0.551	0.842	HSP90AA1|2.466	1	57	98	7057	http://www.kegg.jp/kegg-bin/show_pathway?hsa04621/hsa:3320%09red
FoxO signaling pathway	hsa04068	0.559	0.846	EGF|0.7943;CAT|22.4905	2	134	98	7057	http://www.kegg.jp/kegg-bin/show_pathway?hsa04068/hsa:1950%09blue/hsa:847%09red
Measles	hsa05162	0.567	0.846	MSN|3.9084;HSPA8|2.3988	2	136	98	7057	http://www.kegg.jp/kegg-bin/show_pathway?hsa05162/hsa:4478%09red/hsa:3312%09red
Viral myocarditis	hsa05416	0.569	0.846	HLA-DRA|1.406	1	60	98	7057	http://www.kegg.jp/kegg-bin/show_pathway?hsa05416/hsa:3122%09red
VEGF signaling pathway	hsa04370	0.575	0.847	HSPB1|0.3837	1	61	98	7057	http://www.kegg.jp/kegg-bin/show_pathway?hsa04370/hsa:3315%09blue
Arachidonic acid metabolism	hsa00590	0.581	0.848	GGT1|5.0582	1	62	98	7057	http://www.kegg.jp/kegg-bin/show_pathway?hsa00590/hsa:2678%09red
Parkinson's disease	hsa05012	0.591	0.849	UBA1|0.0107;PARK7|5.9704	2	142	98	7057	http://www.kegg.jp/kegg-bin/show_pathway?hsa05012/hsa:7317%09blue/hsa:11315%09red
Glioma	hsa05214	0.599	0.849	EGF|0.7943	1	65	98	7057	http://www.kegg.jp/kegg-bin/show_pathway?hsa05214/hsa:1950%09blue
Pancreatic cancer	hsa05212	0.604	0.849	EGF|0.7943	1	66	98	7057	http://www.kegg.jp/kegg-bin/show_pathway?hsa05212/hsa:1950%09blue
Inflammatory bowel disease (IBD)	hsa05321	0.604	0.849	HLA-DRA|1.406	1	66	98	7057	http://www.kegg.jp/kegg-bin/show_pathway?hsa05321/hsa:3122%09red
p53 signaling pathway	hsa04115	0.621	0.862	SHISA5|0.2704	1	69	98	7057	http://www.kegg.jp/kegg-bin/show_pathway?hsa04115/hsa:51246%09blue
Inositol phosphate metabolism	hsa00562	0.631	0.862	TPI1|2.0893	1	71	98	7057	http://www.kegg.jp/kegg-bin/show_pathway?hsa00562/hsa:7167%09red
Thyroid hormone synthesis	hsa04918	0.631	0.862	LRP2|0.1459	1	71	98	7057	http://www.kegg.jp/kegg-bin/show_pathway?hsa04918/hsa:4036%09blue
Hippo signaling pathway	hsa04390	0.635	0.862	YWHAZ|2.704;CDH1|0.8091	2	154	98	7057	http://www.kegg.jp/kegg-bin/show_pathway?hsa04390/hsa:7534%09red/hsa:999%09blue
Adherens junction	hsa04520	0.647	0.862	CDH1|0.8091	1	74	98	7057	http://www.kegg.jp/kegg-bin/show_pathway?hsa04520/hsa:999%09blue
Arrhythmogenic right ventricular cardiomyopathy (ARVC)	hsa05412	0.647	0.862	DSC2|0.118	1	74	98	7057	http://www.kegg.jp/kegg-bin/show_pathway?hsa05412/hsa:1824%09blue
Pathways in cancer	hsa05200	0.653	0.863	HSP90AA1|2.466;KLK3|65.4636;EGF|0.7943;CDH1|0.8091;FN1|2.3988	5	397	98	7057	http://www.kegg.jp/kegg-bin/show_pathway?hsa05200/hsa:3320%09red/hsa:354%09red/hsa:1950%09blue/hsa:999%09blue/hsa:2335%09red
Cardiac muscle contraction	hsa04260	0.666	0.873	TPM4|0.3076	1	78	98	7057	http://www.kegg.jp/kegg-bin/show_pathway?hsa04260/hsa:7171%09blue
Salmonella infection	hsa05132	0.702	0.889	CD14|0.8241	1	86	98	7057	http://www.kegg.jp/kegg-bin/show_pathway?hsa05132/hsa:929%09blue
Small cell lung cancer	hsa05222	0.702	0.889	FN1|2.3988	1	86	98	7057	http://www.kegg.jp/kegg-bin/show_pathway?hsa05222/hsa:2335%09red
Gap junction	hsa04540	0.71	0.889	EGF|0.7943	1	88	98	7057	http://www.kegg.jp/kegg-bin/show_pathway?hsa04540/hsa:1950%09blue
ErbB signaling pathway	hsa04012	0.71	0.889	EGF|0.7943	1	88	98	7057	http://www.kegg.jp/kegg-bin/show_pathway?hsa04012/hsa:1950%09blue
Salivary secretion	hsa04970	0.714	0.889	LYZ|0.5346	1	89	98	7057	http://www.kegg.jp/kegg-bin/show_pathway?hsa04970/hsa:4069%09blue
Dilated cardiomyopathy	hsa05414	0.718	0.889	TPM4|0.3076	1	90	98	7057	http://www.kegg.jp/kegg-bin/show_pathway?hsa05414/hsa:7171%09blue
Rheumatoid arthritis	hsa05323	0.722	0.889	HLA-DRA|1.406	1	91	98	7057	http://www.kegg.jp/kegg-bin/show_pathway?hsa05323/hsa:3122%09red
Fc gamma R-mediated phagocytosis	hsa04666	0.73	0.889	GSN|0.0718	1	93	98	7057	http://www.kegg.jp/kegg-bin/show_pathway?hsa04666/hsa:2934%09blue
Longevity regulating pathway	hsa04211	0.734	0.889	CAT|22.4905	1	94	98	7057	http://www.kegg.jp/kegg-bin/show_pathway?hsa04211/hsa:847%09red
Herpes simplex infection	hsa05168	0.736	0.889	HLA-DRA|1.406;C3|1.3804	2	186	98	7057	http://www.kegg.jp/kegg-bin/show_pathway?hsa05168/hsa:3122%09red/hsa:718%09red
Pancreatic secretion	hsa04972	0.741	0.889	CA2|8.7096	1	96	98	7057	http://www.kegg.jp/kegg-bin/show_pathway?hsa04972/hsa:760%09red
Progesterone-mediated oocyte maturation	hsa04914	0.748	0.891	HSP90AA1|2.466	1	98	98	7057	http://www.kegg.jp/kegg-bin/show_pathway?hsa04914/hsa:3320%09red
Choline metabolism in cancer	hsa05231	0.759	0.894	EGF|0.7943	1	101	98	7057	http://www.kegg.jp/kegg-bin/show_pathway?hsa05231/hsa:1950%09blue
Glucagon signaling pathway	hsa04922	0.762	0.894	PKM|4.9659	1	102	98	7057	http://www.kegg.jp/kegg-bin/show_pathway?hsa04922/hsa:5315%09red
TNF signaling pathway	hsa04668	0.788	0.917	VCAM1|9.4624	1	110	98	7057	http://www.kegg.jp/kegg-bin/show_pathway?hsa04668/hsa:7412%09red
Rap1 signaling pathway	hsa04015	0.797	0.921	EGF|0.7943;CDH1|0.8091	2	211	98	7057	http://www.kegg.jp/kegg-bin/show_pathway?hsa04015/hsa:1950%09blue/hsa:999%09blue
Vascular smooth muscle contraction	hsa04270	0.816	0.934	MYLK|0.7516	1	120	98	7057	http://www.kegg.jp/kegg-bin/show_pathway?hsa04270/hsa:4638%09blue
Oocyte meiosis	hsa04114	0.824	0.934	YWHAZ|2.704	1	123	98	7057	http://www.kegg.jp/kegg-bin/show_pathway?hsa04114/hsa:7534%09red
Cell cycle	hsa04110	0.826	0.934	YWHAZ|2.704	1	124	98	7057	http://www.kegg.jp/kegg-bin/show_pathway?hsa04110/hsa:7534%09red
Hepatitis C	hsa05160	0.847	0.941	EGF|0.7943	1	133	98	7057	http://www.kegg.jp/kegg-bin/show_pathway?hsa05160/hsa:1950%09blue
Spliceosome	hsa03040	0.849	0.941	HSPA8|2.3988	1	134	98	7057	http://www.kegg.jp/kegg-bin/show_pathway?hsa03040/hsa:3312%09red
Ubiquitin mediated proteolysis	hsa04120	0.856	0.941	UBA1|0.0107	1	137	98	7057	http://www.kegg.jp/kegg-bin/show_pathway?hsa04120/hsa:7317%09blue
Wnt signaling pathway	hsa04310	0.867	0.941	MMP7|0.0817	1	143	98	7057	http://www.kegg.jp/kegg-bin/show_pathway?hsa04310/hsa:4316%09blue
Phospholipase D signaling pathway	hsa04072	0.869	0.941	EGF|0.7943	1	144	98	7057	http://www.kegg.jp/kegg-bin/show_pathway?hsa04072/hsa:1950%09blue
Hepatitis B	hsa05161	0.873	0.941	YWHAZ|2.704	1	146	98	7057	http://www.kegg.jp/kegg-bin/show_pathway?hsa05161/hsa:7534%09red
Adrenergic signaling in cardiomyocytes	hsa04261	0.878	0.941	TPM4|0.3076	1	149	98	7057	http://www.kegg.jp/kegg-bin/show_pathway?hsa04261/hsa:7171%09blue
HTLV-I infection	hsa05166	0.88	0.941	VCAM1|9.4624;HLA-DRA|1.406	2	259	98	7057	http://www.kegg.jp/kegg-bin/show_pathway?hsa05166/hsa:7412%09red/hsa:3122%09red
Oxytocin signaling pathway	hsa04921	0.893	0.948	MYLK|0.7516	1	158	98	7057	http://www.kegg.jp/kegg-bin/show_pathway?hsa04921/hsa:4638%09blue
cGMP-PKG signaling pathway	hsa04022	0.906	0.952	MYLK|0.7516	1	167	98	7057	http://www.kegg.jp/kegg-bin/show_pathway?hsa04022/hsa:4638%09blue
Purine metabolism	hsa00230	0.917	0.952	PKM|4.9659	1	176	98	7057	http://www.kegg.jp/kegg-bin/show_pathway?hsa00230/hsa:5315%09red
Transcriptional misregulation in cancer	hsa05202	0.922	0.952	CD14|0.8241	1	180	98	7057	http://www.kegg.jp/kegg-bin/show_pathway?hsa05202/hsa:929%09blue
Calcium signaling pathway	hsa04020	0.922	0.952	MYLK|0.7516	1	180	98	7057	http://www.kegg.jp/kegg-bin/show_pathway?hsa04020/hsa:4638%09blue
Huntington's disease	hsa05016	0.935	0.96	SOD1|5.7016	1	193	98	7057	http://www.kegg.jp/kegg-bin/show_pathway?hsa05016/hsa:6647%09red
Ras signaling pathway	hsa04014	0.961	0.98	EGF|0.7943	1	228	98	7057	http://www.kegg.jp/kegg-bin/show_pathway?hsa04014/hsa:1950%09blue
Cytokine-cytokine receptor interaction	hsa04060	0.977	0.986	EGF|0.7943	1	265	98	7057	http://www.kegg.jp/kegg-bin/show_pathway?hsa04060/hsa:1950%09blue
Neuroactive ligand-receptor interaction	hsa04080	0.981	0.986	PLG|0.3908	1	278	98	7057	http://www.kegg.jp/kegg-bin/show_pathway?hsa04080/hsa:5340%09blue
MicroRNAs in cancer	hsa05206	0.986	0.986	RDX|1.5704	1	297	98	7057	http://www.kegg.jp/kegg-bin/show_pathway?hsa05206/hsa:5962%09red
